# Supplementary material
Source: publisher figshare collection journal article supplement (https://gsajournals.figshare.com/ndownloader/files/12961256)
Supplement: Supplementary file 1 [file 12961256]

**Table S1. Information concerning strains generated or used for this study.**

All strains, alleles and plasmids used, with references.

**Strain Genotype**

GC1288: *glp-1(e2141) rsks-1(sv31) III; naIs44 [pGC520 (pie-1p::rsks-1cDNA::GFP::pie-1 3' UTR unc-119(+))]*

GC1289: *rrf-1(pk1417) I; glp-1(e2141) ife-1(bn127) III*

GC1326: *rrf-1(pk1417) I ; glp-1(e2141) rsks-1(sv31) III*

GC1329: *glp-1(e2141) rsks-1(sv31) III; naIs48 [pGC609 (pie-1p::rsks-1 cDNA(T404A)::GFP::pie-1 3'UTR unc-119(+))]*

GC1341: *glp-1(e2141); rsks-1(sv31) III; svIs64 [rsks-1::GFP]*

GC1373: *rrf-1(pk1417) I ; glp-1(e2141) III; hjSi20 [myo-2p::mCherry::unc-54 3'UTR] IV ; zuIs70 [end-1p::gfp::caax; unc-119(+)] V*

GC1374: *rrf-1(pk1417) I; hjSi20 [myo-2p::mCherry::unc-54 3'UTR] IV; zuIs70 [end-1p::gfp::caax; unc-119(+)] V*

GC1413: *rrf-1(pk1417) I; naSi2(mex-5p::H2B::mCherry::nos-2 3'UTR) II; teIs113(pie-1p::GFP::H2B::zif-1 3'UTR) V*

GC1414: *rrf-1(pk1417) I; naSi2(mex-5p::H2B::mCherry::nos-2 3'UTR) II; glp-1 (e2141) III; teIs113(pie-1p::GFP::H2B::zif-1 3'UTR) V*

PD8488: *rrf-1(pk1417) I*

**Allele Information/Reference(s)**

*glp-1(e2141)* Priess, J. R., H. Schnabel and R. Schnabel, 1987 The glp-1 locus and cellular interactions in early C. elegans embryos. Cell 51: 601-611.

Dalfo, D., J. R. Priess, R. Schnabel and E. J. A. Hubbard, 2010 glp-1(e2141) sequence correction, in *Worm Breeder’s Gazette* http://wbg.wormbook.org/2010/12/06/glp-1e2141-sequence-correction/

*rsks-1(sv31)* Hansen, M., S. Taubert, D. Crawford, N. Libina, S. J. Lee *et al.*, 2007 Lifespan extension by conditions that inhibit translation in Caenorhabditis elegans. Aging Cell 6**:** 95-110.

*svIs64, naIs44, naIs48* Korta, D. Z., S. Tuck and E. J. Hubbard, 2012 S6K links cell fate, cell cycle and nutrient response in C. elegans germline stem/progenitor cells. Development 139**:** 859-870.

*ife-1(bn127)* Henderson, M. A., E. Cronland, S. Dunkelbarger, V. Contreras, S. Strome *et al.*, 2009 A germline-specific isoform of eIF4E (IFE-1) is required for efficient translation of stored mRNAs and maturation of both oocytes and sperm. J Cell Sci 122**:** 1529-1539.

*rrf-1(pk1417)* Sijen, T., J. Fleenor, F. Simmer, K. L. Thijssen, S. Parrish *et al.*, 2001 On the role of RNA amplification in dsRNA-triggered gene silencing. Cell 107**:** 465-476.

*hjSi20* Vargas, E., K. McNally, J. A. Friedman, D. B. Cortes, D. Y. Wang *et al.*, 2017 Autosomal Trisomy and Triploidy Are Corrected During Female Meiosis in Caenorhabditis elegans. Genetics 207**:** 911-922.

*zuIs70* Wehman, A. M., C. Poggioli, P. Schweinsberg, B. D. Grant and J. Nance, 2011 The P4-ATPase TAT-5 inhibits the budding of extracellular vesicles in C. elegans embryos. Curr Biol 21**:** 1951-1959.

*naSi2* The *naSi2* allele is an insertion of sequences from the plasmid pGC550 by MosSCI into strain EG4322 [Frøkjaer-Jensen C., Davis M.W., Hopkins C.E., Newman B.J., Thummel J.M. et al., 2008 Single-copy insertion of transgenes in *Caenorhabditis elegans*. Nat Genet. 2008 Nov;40(11):1375-83 The insertion contains C. briggsae *unc-119* sequences and an FRT-flanked *mex-5*p::mCherry::H2B:*nos-2 3’* cassette followed by H2B::GFP. *naSi2* expresses mCherry::H2B in all germ cells.

*teIs113* Guven-Ozkan, T., S. M. Robertson, Y. Nishi and R. Lin, 2010 zif-1 translational repression defines a second, mutually exclusive OMA function in germline transcriptional repression. Development 137**:** 3373-3382.

**Plasmid Information/Reference(s)**

pGC550 Generated by a multisite LR reaction performed between pJA252 (gift from Julie Ahringer, Addgene plasmid # 21512, Zeiser E., Frøkjær-Jensen C., Jorgensen E., Ahringer J. MosSCI and gateway compatible plasmid toolkit for constitutive and inducible expression of transgenes in the *C. elegans* germline. PLoS One. 2011;6(5):e20082), pGC544 [containing an FRT site (“<”)<*mCherry::H2B::nos-2 3’UTR* sequences and inserted into pDONR-2221 by BP reaction], pGC545 [containing *Pmex-5<mCherry::nos-2 3’UTR<GFP::nos-2 3’UTR*], and pCFJ150 - pDESTttTi5605[R4-R3] (gift from Erik Jorgensen, Addgene plasmid # 19329, Frokjaer-Jensen et al., 2008)*.* All plasmids and sequences are available from Addgene or upon request.

pGC734 Generated by Gibson cloning PCR product targeting *rpl-24.2* (amplified from the *C. elegans* cDNA library using primers: GCo2465: TTAATACGACTCACTATAGGGAGACCGGCAG-ATCTGATGCTCGTCTCCCATCTACC and GCo2466: GCCCCCCCTCGAGGTCGACGGTATCGATAAGCTTGATGGTCTCCATCGATTCTGCGGT) into pL4440 vector plasmid.

All plasmids and sequences are available from Addgene or upon request.
